# Supplementary material for: Systematic identification of potential key microRNAs and circRNAs in the dorsal root ganglia of mice with sciatic nerve injury
Source: Front Mol Neurosci. 2023 Mar 14;16:1119164. doi: 10.3389/fnmol.2023.1119164 (PMC10043392; doi:10.3389/fnmol.2023.1119164)
Supplement: Supplementary file 6 [file Table_6.XLSX]

## Sheet: mmu-miR-181a-5p
miRNAid	miRNAname	geneID	geneName	geneType	chromosome	start	end	strand	clipExpNum	degraExpNum	RBP	merClass	miRseq	align	targetSeq
MIMAT0000210	mmu-miR-181a-5p	NM_133748	Insig2	circRNA	chr1	121305200	121305222	-	2	0	Ago2	7mer-m8	ugaguggcugucgCAACUUACAa	| |||||||	ggggcuuuguuuaGAUGAAUGUg
MIMAT0000210	mmu-miR-181a-5p	NM_001039184	Cep350	circRNA	chr1	155953535	155953558	-	1	0	Ago2	7mer-m8	ugaGUGGC-UGUCGCAACUUACAa	||::| ||||: |||||||	augCAUUGCACAGUUCUGAAUGUu
MIMAT0000210	mmu-miR-181a-5p	NM_010629	Kifap3	circRNA	chr1	163856038	163856060	+	1	0	Ago2	7mer-m8	ugaguggcugucGCAACUUACAa	| ||||||||	aaugaagaugcuCUUUGAAUGUu
MIMAT0000210	mmu-miR-181a-5p	NM_029735	Eprs	circRNA	chr1	185394410	185394428	+	1	0	Ago2	7mer-m8	ugAGUGGCUGUCGCAACUUACAa	||::| ||| |||||||	agUCGUC-CCAG---UGAAUGUc
MIMAT0000210	mmu-miR-181a-5p	NM_183262	Stk35	circRNA	chr2	129810795	129810816	+	3	0	Ago1-4,Ago2	7mer-m8	ugaGUGGCUGUCGCAACUUACAa	:| | | | :| |||||||	agaUAACAAAAAUG-UGAAUGUg
MIMAT0000210	mmu-miR-181a-5p	NM_001199188	Snx5	circRNA	chr2	144261995	144262017	-	1	0	Ago2	7mer-m8	ugaGUGGCUGUCGCAACUUACAa	:::| :::| |||||||	cugUGUCUGUGGACCUGAAUGUu
MIMAT0000210	mmu-miR-181a-5p	NM_027017	3300002I08Rik	circRNA	chr2	150409257	150409280	-	1	0	Ago2	8mer	ugaguggCUGUCGCA-ACUUACAa	|| | | | |||||||	cuggagaGAAACCCUAUGAAUGUa
MIMAT0000210	mmu-miR-181a-5p	NM_001003960	Dnmt3b	circRNA	chr2	153686861	153686882	+	1	0	Ago2	7mer-m8	ugagugGCUGUCGCAACUUACAa	:| :| :| |||||||	ggaggaUGCUAUUG-UGAAUGUg
MIMAT0000210	mmu-miR-181a-5p	NM_001122997	Dnmt3b	circRNA	chr2	153686861	153686882	+	1	0	Ago2	7mer-m8	ugagugGCUGUCGCAACUUACAa	:| :| :| |||||||	ggaggaUGCUAUUG-UGAAUGUg
MIMAT0000210	mmu-miR-181a-5p	NM_138679	Ash1l	circRNA	chr3	88982633	88982651	+	1	0	Ago2	7mer-m8	ugaGUGGCUGUCGCAACUUACAa	:||| || ||||||||	aagUACCCAC----UUGAAUGUu
MIMAT0000210	mmu-miR-181a-5p	NM_001195565	Camta1	circRNA	chr4	151830471	151830497	-	1	0	Ago2	7mer-m8	ugAGUGGC--UGUCG-C-AACUUACAa	|:|||| | ||| | ||||||||	uuUUACCGAAAAAGCUGCUUGAAUGUc
MIMAT0000210	mmu-miR-181a-5p	NM_013726	Dbf4	circRNA	chr5	8403109	8403130	-	1	0	Ago2	7mer-m8	ugaguggCUGUCGCAACUUACAa	||:| :| |||||||	aaaaaagGAUAUUG-UGAAUGUu
MIMAT0000210	mmu-miR-181a-5p	NM_194340	C330019G07Rik	circRNA	chr5	32830604	32830627	-	1	0	Ago2	7mer-m8	ugaguggcUGUCGC-AACUUACAa	|:|| | |||||||	cacacaaaAUAGAGCAUGAAUGUg
MIMAT0000210	mmu-miR-181a-5p	NM_001081102	Whsc1	circRNA	chr5	33843251	33843273	+	1	0	Ago2	7mer-m8	ugaguggcugucgcaACUUACAa	|||||||	cugugaagugaaucaUGAAUGUu
MIMAT0000210	mmu-miR-181a-5p	NM_198702	Lphn3	circRNA	chr5	81465274	81465295	+	2	0	Ago1-4,Ago2	7mer-m8	ugaguggcUGUCGCAACUUACAa	:|||: |||||||	cuugaaguGCAGU-AUGAAUGUg
MIMAT0000210	mmu-miR-181a-5p	NM_178741	Klhl8	circRNA	chr5	103862976	103862999	-	1	0	Ago2	7mer-m8	ugaGUGGCUGUC-GCAACUUACAa	|| |||| | : ||||||||	cugCAGCGACUGUUUUUGAAUGUc
MIMAT0000210	mmu-miR-181a-5p	mmu_circ_0001375	mmu_circ_0001375	circRNA	chr5	104582400	104582423	+	1	0	Ago2	8mer	ugaGUGGCUGUCGCA-ACUUACAa	|| || : | | |||||||	cuaCAGAGAAGCCCUAUGAAUGUa
MIMAT0000210	mmu-miR-181a-5p	NM_012042	Cul1	circRNA	chr6	47497329	47497353	+	3	0	Ago1-4,Ago2	7mer-m8	ugaGUGGCU--GUCGCAACUUACAa	||::|: : || |||||||	agaCAUUGGGUUCGCCGUGAAUGUg
MIMAT0000210	mmu-miR-181a-5p	NM_153516	Bcl2l13	circRNA	chr6	120870776	120870797	+	1	0	Ago2	8mer	ugaguggcUGUCGCAACUUACAa	|:| || |||||||	uaugaggcAUAUCG-UGAAUGUa
MIMAT0000210	mmu-miR-181a-5p	NM_013648	Rtn2	circRNA	chr7	19287388	19287410	+	1	0	Ago2	7mer-m8	ugaguggCUGUCGCAACUUACAa	| | :| |||||||	augaugaGCCUCUGCUGAAUGUg
MIMAT0000210	mmu-miR-181a-5p	NM_028538	1700049G17Rik	circRNA	chr7	27962667	27962688	-	1	0	Ago2	7mer-m8	ugAGUGGCUGUCGCAACUUACAa	||| :|| |: |||||||	ccUCA-UGAAUGUAGUGAAUGUg
MIMAT0000210	mmu-miR-181a-5p	NM_025846	Rras2	circRNA	chr7	114050336	114050358	-	1	0	Ago2	8mer	ugaGUGGCU-GUCGCAACUUACAa	|| || ||| | |||||||	cggCAAAGAUCAG-GAUGAAUGUa
MIMAT0000210	mmu-miR-181a-5p	NM_172754	Zfp868	circRNA	chr8	69706299	69706320	-	2	0	Ago2	8mer	ugAGUGGCUGUCGCAACUUACAa	| || || | ||||||||	ggUAACAAAC-CCUUUGAAUGUa
MIMAT0000210	mmu-miR-181a-5p	NM_172754	Zfp868	circRNA	chr8	69706787	69706810	-	2	0	Ago1-4,Ago2	8mer	ugaguggcUGUCGCA-ACUUACAa	||| :|| |||||||	guggagaaACAUUGUAUGAAUGUa
MIMAT0000210	mmu-miR-181a-5p	NM_172754	Zfp868	circRNA	chr8	69707039	69707062	-	1	0	Ago2	8mer	ugaguggCUGUCGCA-ACUUACAa	|| : | | |||||||	ccggagaGAAGCCCUAUGAAUGUa
MIMAT0000210	mmu-miR-181a-5p	NM_178415	Bbs9	circRNA	chr9	22659066	22659087	+	1	0	Ago2	8mer	ugagugGCUGUCGCAACUUACAa	|||| | |||||||	agaugaCGACCAAG-UGAAUGUa
MIMAT0000210	mmu-miR-181a-5p	NM_019927	Arih1	circRNA	chr9	59426685	59426704	-	1	0	Ago2	7mer-m8	ugAGUGGCUGUCGCAACUUACAa	|:||:| || ||||||||	uuUUACUG---GCCUUGAAUGUg
MIMAT0000210	mmu-miR-181a-5p	NM_177583	Aph1b	circRNA	chr9	66818924	66818946	-	1	0	Ago1-4	7mer-m8	ugaguggcugucgcaACUUACAa	|||||||	gagcaaguaaauaucUGAAUGUg
MIMAT0000210	mmu-miR-181a-5p	NM_010437	Hivep2	circRNA	chr10	14014297	14014320	+	1	0	Ago2	7mer-m8	ugAGUGGCUGUCG-CAACUUACAa	||||| ::|: ||||||||	guUCACCAUUGGUACUUGAAUGUu
MIMAT0000210	mmu-miR-181a-5p	NR_002321	Tug1	circRNA	chr11	3645497	3645516	-	1	0	Ago2	7mer-m8	ugAGUGGCUGUCGCAACUUACAa	|| |:||: || |||||||	ccUC-CUGAUUGC--UGAAUGUu
MIMAT0000210	mmu-miR-181a-5p	NM_172403	2810021J22Rik	circRNA	chr11	58858544	58858565	+	1	0	Ago2	7mer-m8	ugaGUGGCUGUCGCAACUUACAa	:|:|| |||: |||||||	cugUAUCG-CAGUACUGAAUGUg
MIMAT0000210	mmu-miR-181a-5p	NM_172403	2810021J22Rik	circRNA	chr11	58860409	58860433	+	1	0	Ago2	7mer-m8	ugaguggCUGUCG-CA-ACUUACAa	|||| | | |||||||	acaugggGACAUCUCUAUGAAUGUu
MIMAT0000210	mmu-miR-181a-5p	NM_153144	Ggnbp2	circRNA	chr11	84836448	84836473	-	1	0	Ago2	7mer-m8	ugagugGCUGU---CGCAACUUACAa	:|||| |:|||||||||	ugauggUGACAGUUGUGUUGAAUGUu
MIMAT0000210	mmu-miR-181a-5p	NM_144788	Hectd1	circRNA	chr12	51759403	51759425	-	1	0	Ago2	8mer	ugAGUGGCUGUCGCAACUUACAa	|| : || : |||||||||	gcUCUUGGAGGAAGUUGAAUGUa
MIMAT0000210	mmu-miR-181a-5p	NM_009706	Arhgap5	circRNA	chr12	52516204	52516228	+	1	0	Ago2	8mer	ugaGUGGCUGUCGCA--ACUUACAa	:|: | :| | | |||||||	auaUAUGGUUAUCUUUAUGAAUGUa
MIMAT0000210	mmu-miR-181a-5p	NM_009706	Arhgap5	circRNA	chr12	52516838	52516860	+	2	0	Ago1-4,Ago2	7mer-m8	ugagUGGCUGUCGCAACUUACAa	||: | |:| |||||||	agcaACUAAAUGUGAUGAAUGUg
MIMAT0000210	mmu-miR-181a-5p	NM_001167983	Sipa1l1	circRNA	chr12	82341550	82341575	+	1	0	Ago1-4	8mer	ugaguggCUGUC---GCAACUUACAa	||:|| || |||||||	ugaugugGAUAGCUUCGAUGAAUGUa
MIMAT0000210	mmu-miR-181a-5p	NM_144846	Fam49b	circRNA	chr15	63950078	63950100	-	1	0	Ago2	8mer	ugaguggcugucgCAACUUACAa	| |||||||	aaauauauaaucaGGUGAAUGUa
MIMAT0000210	mmu-miR-181a-5p	NM_177124	Tnrc6b	circRNA	chr15	80902641	80902663	+	2	0	Ago2	7mer-m8	ugaGUGGCUGUCGCAACUUACAa	:||| | ||| |||||||	uggUACCCAAUGCGCUGAAUGUg
MIMAT0000210	mmu-miR-181a-5p	NM_010380	H2-D1	circRNA	chr17	35267157	35267179	+	2	0	Ago2	7mer-m8	ugaguggcugucgcAACUUACAa	||||||||	cugagaauaauaauUUGAAUGUg
MIMAT0000210	mmu-miR-181a-5p	mmu_circ_0000823	mmu_circ_0000823	circRNA	chr17	81649469	81649491	-	2	0	Ago1-4,Ago2	8mer	ugagUGGCUGUCGCAACUUACAa	| :|| | | |||||||	aggaAAUGAAACCACUGAAUGUa
MIMAT0000210	mmu-miR-181a-5p	mmu_circ_0000831	mmu_circ_0000831	circRNA	chr17	86488160	86488176	+	1	0	Ago1-4	7mer-m8	ugaguggcugucgcaACUUACAa	|||||||	#NAME?
MIMAT0000210	mmu-miR-181a-5p	NM_198105	Fam120c	circRNA	chrX	151432620	151432641	+	1	0	Ago2	8mer	ugaguggcugUCGCAACUUACAa	|| | |||||||	guauguauugAG-GAUGAAUGUa

## Sheet: mmu-miR-223-3p
miRNAid	miRNAname	geneID	geneName	geneType	chromosome	start	end	strand	clipExpNum	degraExpNum	RBP	merClass	miRseq	align	targetSeq
MIMAT0000665	mmu-miR-223-3p	NM_213616	Atp2b4	circRNA	chr1	133753399	133753420	-	1	0	Ago2	7mer-m8	accccauaaacuGUUUGACUGu	| |||||||	ucaauuuaucccCUAACUGACc
MIMAT0000665	mmu-miR-223-3p	NM_001159963	Fbxl5	circRNA	chr5	43758715	43758741	-	3	0	Ago2	8mer	accccAUAAAC-UGU----UUGACUGu	|:|||| ||| |||||||	augccUGUUUGCACAAUUUAACUGACa
MIMAT0000665	mmu-miR-223-3p	NM_198702	Lphn3	circRNA	chr5	81512108	81512130	+	1	0	Ago2	8mer	accccauaaacUGU-UUGACUGu	||| |||||||	cuggacucccuACAGAACUGACa
MIMAT0000665	mmu-miR-223-3p	NM_033604	Rnf111	circRNA	chr9	70469392	70469413	-	4	0	Ago2	8mer	accccAUAAACUGUUUGACUGu	|:|| : |||||||	auuaaUGUUACCUCAACUGACa
MIMAT0000665	mmu-miR-223-3p	NM_146239	Cdk17	circRNA	chr10	93224956	93224977	+	1	0	Ago2	8mer	accccauaaacUGUUUGACUGu	::||||||||	uaaaggaagaaGUAAACUGACa
MIMAT0000665	mmu-miR-223-3p	NM_001164231	Pwwp2a	circRNA	chr11	43705013	43705033	+	3	0	Ago2	7mer-m8	accccauaaACUGUUUGACUGu	||| ||||||||	acaaaaaacUGA-AAACUGACc
MIMAT0000665	mmu-miR-223-3p	NM_174852	Phf12	circRNA	chr11	78009754	78009775	+	1	0	Ago2	7mer-m8	accccauaaacUGUUUGACUGu	||:|||||||	ucaguugcccaACGAACUGACc
MIMAT0000665	mmu-miR-223-3p	NM_001081045	1700081L11Rik	circRNA	chr11	104423954	104423975	-	3	0	Ago2	7mer-m8	accccauaaaCUGUUUGACUGu	|| :|||||||	cauugaagagGAAGAACUGACu
MIMAT0000665	mmu-miR-223-3p	NM_009706	Arhgap5	circRNA	chr12	52517396	52517418	+	1	0	Ago2	7mer-m8	accccauaaaCUG-UUUGACUGu	||: ||||||||	aacaccuuggGAUGAAACUGACc
MIMAT0000665	mmu-miR-223-3p	NM_001033213	Ttc7b	circRNA	chr12	100495396	100495417	-	1	0	Ago2	7mer-m8	accCCAUAAACUGUUUGACUGu	||| | | |||||||||	ucuGGUCAUGGCCAAACUGACu
MIMAT0000665	mmu-miR-223-3p	NM_029498	Zmym2	circRNA	chr14	56902721	56902741	+	1	0	Ago2	7mer-m8	acCCCAUAAACUGUUUGACUGu	||| | | | :|||||||	guGGGAACGUUA-GAACUGACu
MIMAT0000665	mmu-miR-223-3p	NM_013836	Tcf20	circRNA	chr15	82851875	82851896	-	1	0	Ago2	8mer	accccAUAAACUGUUUGACUGu	|: || ||||||||	ucuaaUGGUUCUAAAACUGACa
MIMAT0000665	mmu-miR-223-3p	NM_146087	Csnk1a1	circRNA	chr18	61580445	61580466	+	1	0	Ago2	8mer	accccauaaacUGUUUGACUGu	:|||||||||	cccacaggcaaGCAAACUGACa
MIMAT0000665	mmu-miR-223-3p	NM_019634	Tspan7	circRNA	chrX	10585573	10585596	+	3	0	Ago1-4,Ago2	7mer-m8	accCCAUAAAC-UG-UUUGACUGu	| |: || || ||||||||	guuGCUGCAUGAACGAAACUGACu
